# Supplementary material
Source: Springer Nature journal article supplement (https://www.springermedizin.de/resource/supplementary/13054_2009_7628_MOESM2_ESM.pdf/9730190)

# platelet count

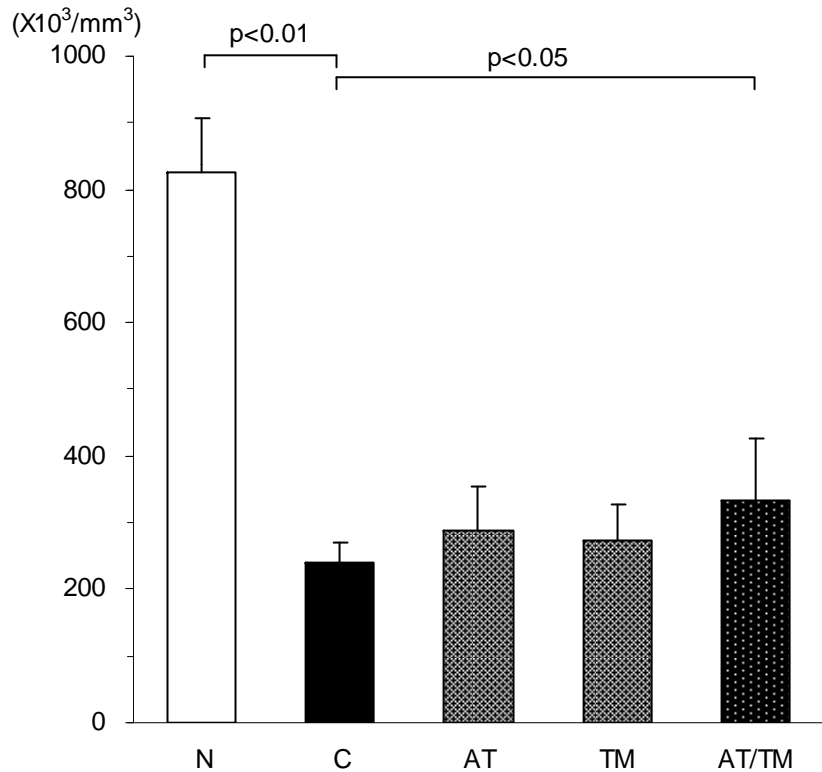

# fibrinogen level

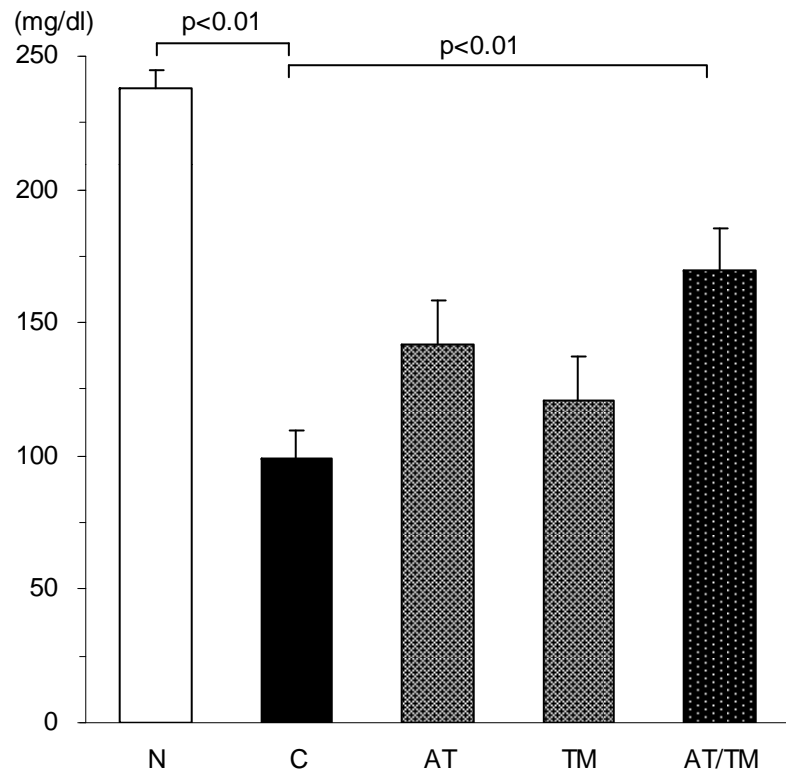

Supplement: MOESM2 [file 9730190]
